# Supplementary material for: In vitro generation of self-renewing human intestinal epithelia over planar and shaped collagen hydrogels
Source: Springer Nature journal article supplement (doi:10.1038/s41596-020-00419-8), 2020-12-09
Supplement: MOESM1 [file 41596_2020_419_MOESM1_ESM16.pdf]

## Supplementary information

---

# In vitro generation of self-renewing human intestinal epithelia over planar and shaped collagen hydrogels

---

In the format provided by the authors and unedited

**Supplementary Information**

***In Vitro Generation of Self-Renewing Human Intestinal Epithelia over Planar and Shaped Collagen Hydrogels***

Samuel S. Hinman, Yuli Wang, Raehyun Kim, Nancy L. Allbritton\*

Department of Bioengineering, University of Washington, Seattle, WA 98195, USA

\*Corresponding Author: nlallbr@uw.edu

---

|                                                                                  |   |   |   |   |    |
|----------------------------------------------------------------------------------|---|---|---|---|----|
| <b>Supplementary Figure 1:</b> Effects of improper micromolding                  | . | . | . | . | S2 |
| <b>Supplementary Figure 2:</b> Images of stunted and dead <i>in vitro</i> crypts | . | . | . | . | S3 |
| <b>Supplementary Figure 3:</b> Unpolarized <i>in vitro</i> crypts                | . | . | . | . | S4 |
| <b>Supplementary Table 1:</b> Fluorescent labeling parameters                    | . | . | . | . | S5 |

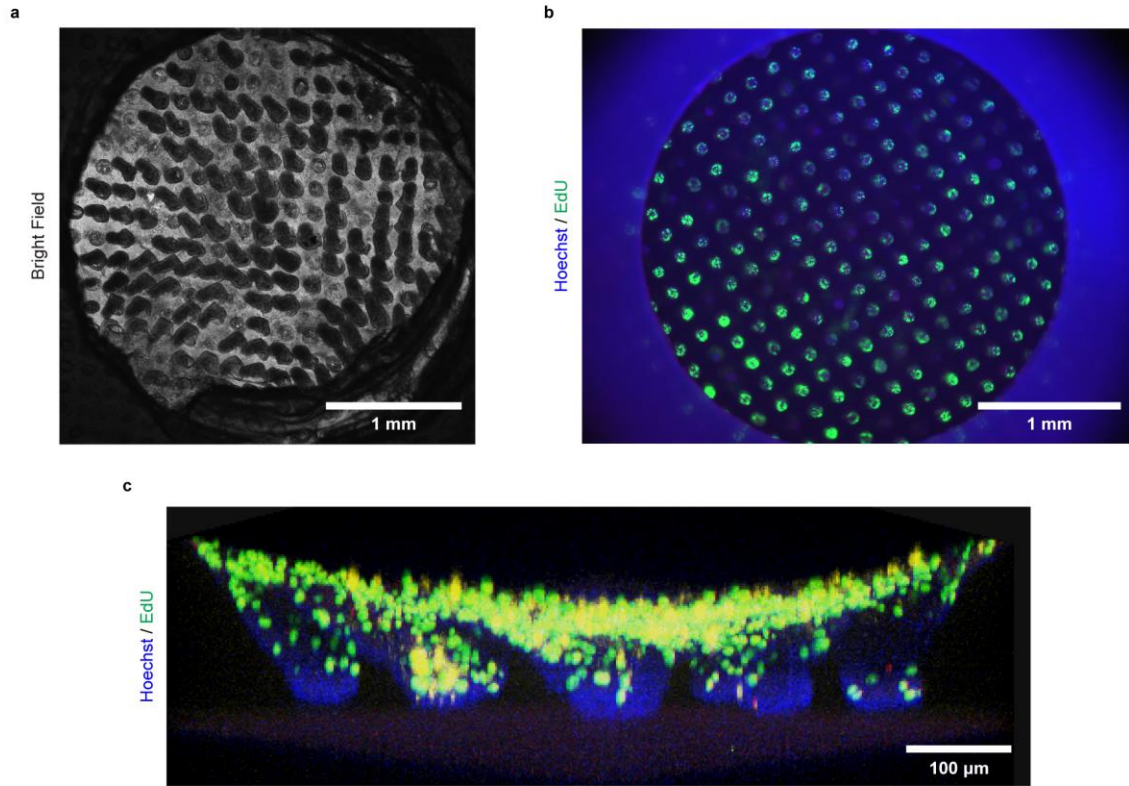

**Supplementary Figure 1 |** Effects of improper micromolding. **a**, PDMS stamp was not lifted vertically from the gel, causing its deformation. **b**, PDMS stamps was not perfectly horizontal during micromolding. The collagen hydrogel (underneath the microwells) is therefore tilted, generating an uneven gradient of growth factors across the array. The lower half has more stem/proliferative cells (EdU<sup>+</sup>) than the upper half. **c**, Pressure was not applied during micromolding, and the collagen hydrogel did not extend up the full length of the PDMS micropillars. The human colonic biopsy specimen (male, 52 y) utilized to generate the data in this figure was obtained during a routine screening colonoscopy performed at the University of North Carolina (UNC) Hospitals Meadowmount Endoscopy Center under UNC IRB #14-2013.

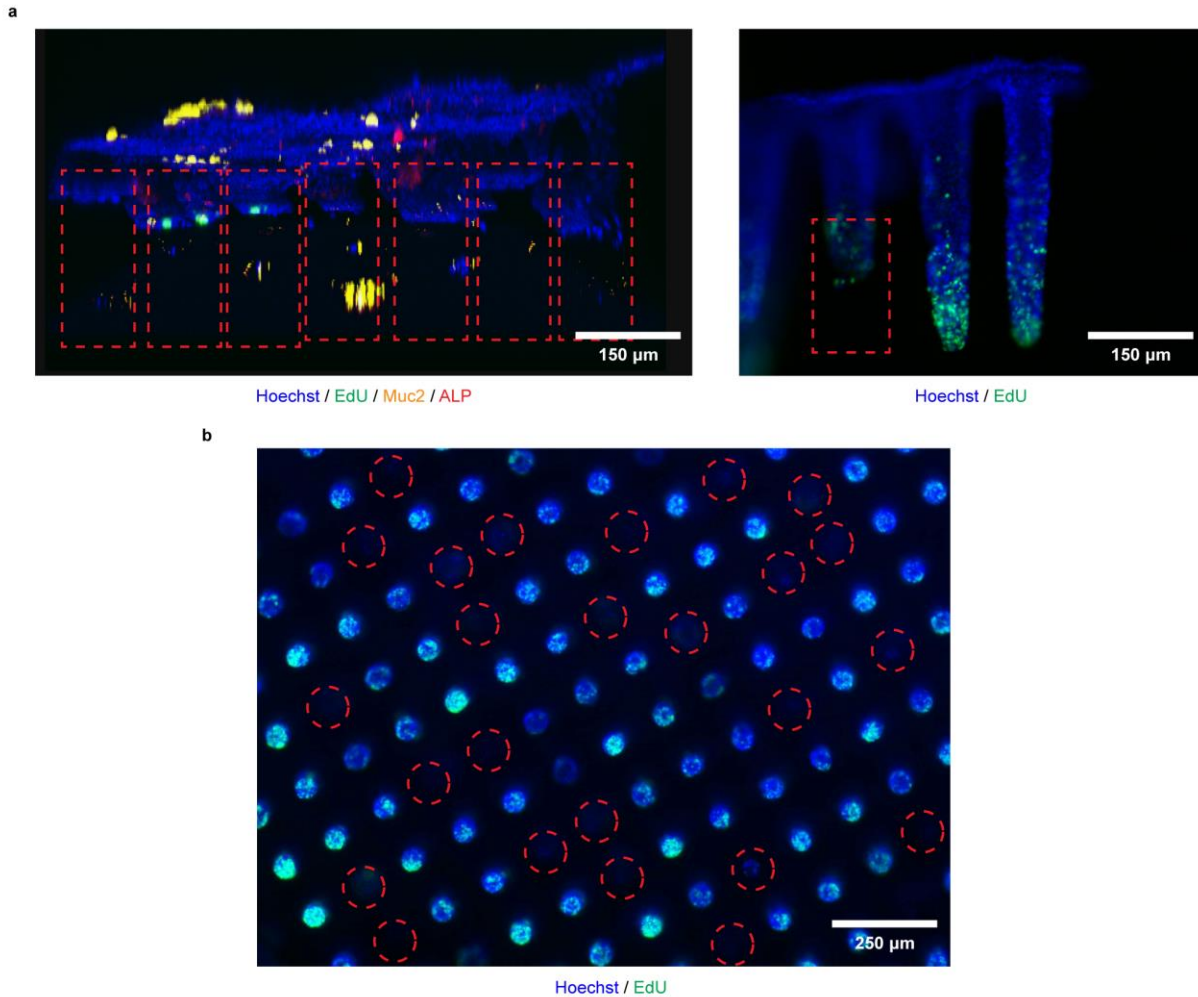

**Supplementary Figure 2** | Images of stunted and dead *in vitro* crypts. **a**, *In vitro* crypts only grow halfway down the microwells (outlined within red dashed line), caused by insufficient fragmentation of cell colonies while plating over the shaped scaffolds. The crypts effectively become “blocked” by these larger cell colonies. The images in both subpanels depict the same issue in separate experiments. **b**, Many microwells will not obtain stem/proliferative cells during plating, and therefore may not grow to full length crypts. If greater than 30% of the microwells do not grow to full length *in vitro* crypts, time of passage must be optimized. However, proper polarization of full length *in vitro* crypts will not be affected by surrounding microwells. The human colonic biopsy specimen (male, 52 y) utilized to generate the data in this figure was obtained during a routine screening colonoscopy performed at the University of North Carolina (UNC) Hospitals Meadowmount Endoscopy Center under UNC IRB #14-2013.

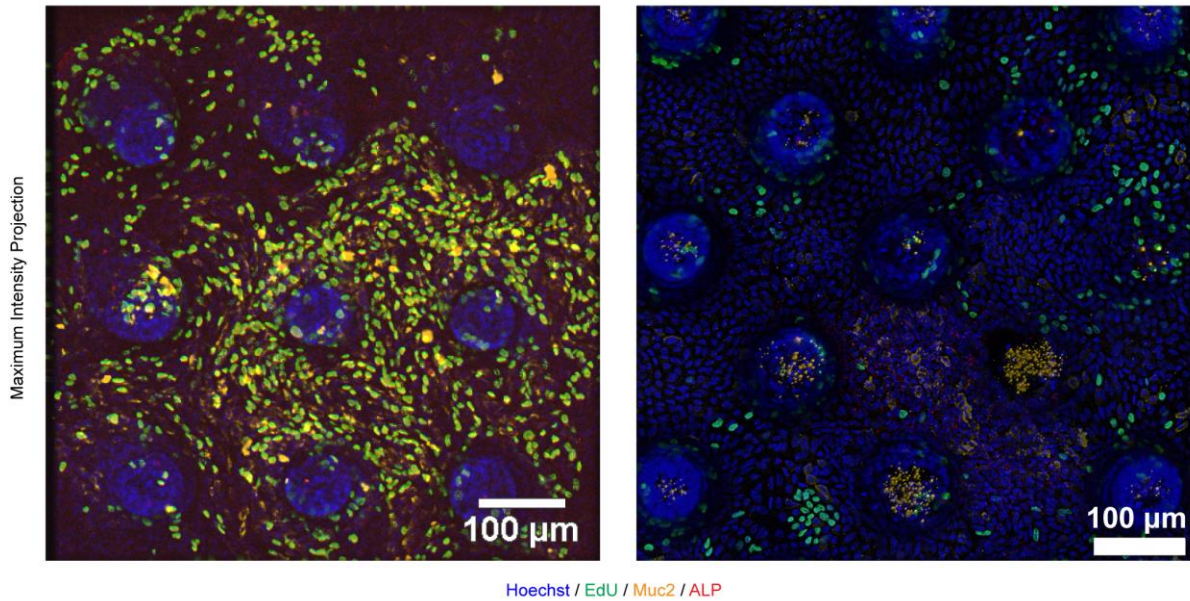

**Supplementary Figure 3** | Unpolarized *in vitro* crypts. Both of the above examples demonstrate crypts that did not polarize into stem/proliferative and differentiated cell zones, with proliferative cells (EdU<sup>+</sup>) along the entire crypt length. This may be caused by a leak of growth factors between basal and luminal compartments, growth factor concentrations (*i.e.*, Wnt3a, R-spondin 3, and noggin) with the basal medium being too high, or utilization of non-optimized scaffold dimensions (*e.g.*, shorter height). The human colonic biopsy specimen (male, 52 y) utilized to generate the data in this figure was obtained during a routine screening colonoscopy performed at the University of North Carolina (UNC) Hospitals Meadowmount Endoscopy Center under UNC IRB #14-2013.

**Supplementary Table 1** | Routine solutions validated for labeling primary human intestinal epithelial cells cultured over collagen hydrogel scaffolds. PFA = 4% paraformaldehyde, RT = room temperature, MeOH = 100% methanol.

| Target                                | Antibody (with RRID) or Labeling Kit Information                                                                  | Fixation Strategy                                | Concentration/Dilution Ratio |
|---------------------------------------|-------------------------------------------------------------------------------------------------------------------|--------------------------------------------------|------------------------------|
| Nuclei                                | B2261, Millipore-Sigma                                                                                            | 15 min PFA (RT) or 60 min MeOH (-20 °C)          | 2 µg mL <sup>-1</sup>        |
| Olfactomedin 4 (Olfm4)                | 14369, Cell Signaling Tech. (RRID:AB_2798465)                                                                     | 15 min PFA (RT)                                  | 1:200                        |
| SRY-box transcription factor 9 (Sox9) | AB5535, Millipore-Sigma (RRID:AB_2239761)                                                                         | 15 min PFA                                       | 1:100                        |
| Nuclei of proliferative cells         | C10340, ThermoFisher                                                                                              | 15 min PFA (RT) or 60 min MeOH (-20 °C)          | Manufacturer-recommended     |
| Cytokeratin-20 (KRT20)                | 13063, Cell Signaling Tech. (RRID:AB_2798106), 60183-1, ProteinTech (RRID:AB10858399)                             | 15 min PFA (RT)                                  | 1:500                        |
| Mucin-2 (Muc2)                        | sc-15334, Santa Cruz (RRID:AB_2146667), sc-515032, Santa Cruz (RRID:AB_2815005), ab76774, Abcam (RRID:AB_1523987) | 15 min PFA (RT) or 30 min Carnoy's solution (RT) | 1:200                        |
| Alkaline phosphatase                  | SK5100, Vector Laboratories (RRID:AB_2336847)                                                                     | 15 min PFA (RT)                                  | Manufacturer-recommended     |
| Chromogranin A                        | ab15160, Abcam (RRID:AB_301704)                                                                                   | 15 min PFA (RT)                                  | 1:1000                       |
| Villin                                | sc-2823, Santa Cruz                                                                                               | 15 min PFA (RT)                                  | 1:200                        |
| Ezrin                                 | PA5-17518, ThermoFisher (RRID:AB_10977904)                                                                        | 15 min PFA (RT)                                  | 1:200                        |
| Integrin-β4                           | sc-9090, Santa Cruz (RRID:AB_2129021)                                                                             | 15 min PFA (RT)                                  | 1:200                        |
| Actin                                 | A12379, ThermoFisher R37110, ThermoFisher                                                                         | 15 min PFA                                       | Manufacturer-recommended     |
| Zonula-occludens-1 (ZO-1)             | 21773-1-AP, ProteinTech (RRID:AB_10733242)                                                                        | 60 min MeOH (-20 °C)                             | 1:500                        |
| E-cadherin                            | 20874-1-AP, ProteinTech (RRID:AB_10697811), sc-7870, Santa Cruz (RRID:AB_2076666)                                 | 60 min MeOH (-20 °C)                             | 1:200                        |
| β-catenin                             | sc-7963, Santa Cruz (RRID:AB_626807)                                                                              | 60 min MeOH (-20 °C)                             | 1:200                        |
| Occludin                              | 13409-1-AP, ProteinTech (RRID:AB_2156308)                                                                         | 60 min MeOH (-20 °C)                             | 1:100                        |
