# Supplementary material for: In vitro generation of self-renewing human intestinal epithelia over planar and shaped collagen hydrogels
Source: Springer Nature journal article supplement (doi:10.1038/s41596-020-00419-8), 2020-12-09
Supplement: MOESM3 [file 41596_2020_419_MOESM3_ESM18.xlsx]

## Sheet: Collagen Neutralization Volumes
Instructions: Change starting and ending collagen concentrations (in yellow), and both neutralization buffer consituents and mixing volumes will automatically repopulate.
Stock Concentrations
Collagen Stock (mg/mL)	3.36
Acetic Acid, in collagen stock (M)	0.02
HEPES Stock (M)	1
7.5 wt % NaHCO3 (M)	0.893
PBS Stock (x)	10
NaOH (M)	1
Final Concentrations (during neutralization)
HEPES (M)	0.02
NaHCO3 (M)	0.053
PBS (x)	1
Collagen (mg/mL)	1
Acetic Acid	0.00595238
NaOH	0.00595238
Ratios for Mixing
Collagen Stock	0.297619
Neutralization Buffer	0.702381
Neutralization Buffer Prep	Needed Concentration (M or x)	Required Amount of Stock for 50 mL
HEPES	0.0284746	1.42373
NaHCO3	0.0754576	4.22495
PBS	1.42373	7.11864
NaOH	0.00847458	0.423729
Water	N/A	36.8089
Final Mixing Volumes (uL)	Collagen (uL)	Neutralization Buffer (uL)
250	74.4048	175.595
300	89.2857	210.714
350	104.167	245.833
500	148.81	351.19
50000	14881	35119

## Sheet: Subcultivation Ratios
Instructions: Change desired number of wells/inserts for planned culture format (in yellow), and the number of maintenance wells (6-well format) needed will automatically repopulate.
Reference Values
Culture Format	Surface Area (cm2)	Part Number
6-well	9	N/A (Generic)
12-well	4	N/A (Generic)
24-well	2	N/A (Generic)
96-well	0.32	N/A (Generic)
12-well Falcon insert	0.9	353180 (Corning)
12-well Transwell	1.12	3401 (Corning)
96-well Millicell	0.11	PSHT004S5 (Millipore-Sigma)
I want to culture...		Therefore, I need…	Using a subcultivation ratio of…
Number of Wells/Inserts	Culture Format	Number of Confluent 6-Wells	Passage Ratio (Surface Area)
3	6-wells	1	0.333333
0	12-wells	0	0.333333
0	24-wells	0	0.333333
0	96-wells	0	0.333333
0	12-well Falcon inserts for monolayers	0	1.66667
0	12-well Transwells for monolayers	0	1.66667
0	12-well Transwells for in vitrocrypts	0	2.00893
0	96-well Millicells	0	1.70455
